# Supplementary material
Source: publisher figshare collection journal article supplement (https://sage.figshare.com/ndownloader/files/17591474)
Supplement: Supplementary file 1 [file 17591474]

## Appendix 1. Summary of studies synthesized

| No.* | Method-ology                  | classification  | Participants                                                         | CASP | Key findings related to family dynamics                                                                                                                                                                                                                                                                                                                                                                                                                                                                                                                                                                                                                                                                                                                                                                                 |
|------|-------------------------------|-----------------|----------------------------------------------------------------------|------|-------------------------------------------------------------------------------------------------------------------------------------------------------------------------------------------------------------------------------------------------------------------------------------------------------------------------------------------------------------------------------------------------------------------------------------------------------------------------------------------------------------------------------------------------------------------------------------------------------------------------------------------------------------------------------------------------------------------------------------------------------------------------------------------------------------------------|
| R1   | case study                    | Thematic survey | husband 7, wife 1, son 1, sister 1                                   | good | <ul style="list-style-type: none"> <li>• Difficulty in understanding and accepting early-onset dementia</li> <li>• The responsibility of providing family support</li> <li>• Hardship in receiving support and recognition from family members and people around them</li> <li>• Difficulty in determining and maintaining appropriate treatment for the person with dementia due to the condition's differing nature from that of late-onset dementia</li> <li>• Caregivers want to keep their unmarried children away from the caregiving responsibilities</li> <li>• Obliging with the responsibility as a spouse to care for the person with dementia who is neglected by the society</li> <li>• Strong need for professional, systematic assistance for early-onset dementia, along with fiscal support</li> </ul> |
| R2   | Not mentioned                 | Thematic survey | husband 1, wife 1, son 1, daughter 1, daughter-in-law 1              | good | <ul style="list-style-type: none"> <li>• Aimless wandering was the biggest stressor for the family because they needed to be extremely vigilant all the time.</li> <li>• Decisions regarding the designation of the primary caregiver not being based on consensus among family members; a sense of responsibility based on social norms because of matrimonial or filial relationships as the motive for caregiving; not expecting to receive support from other family members</li> <li>• Husband or daughter caregivers had a positive attitude of providing care for the person with dementia out of love</li> <li>• The quality of the relationship with the person with dementia in the past affects the caregiver's attitude towards caregiving</li> </ul>                                                       |
| R3   | Thematic approach             | Thematic survey | daughter-in-law 8, daughter 2<br>[5 researchers & service providers] | good | <ul style="list-style-type: none"> <li>• Cultural influences on caregiving vs. seeking outside care</li> <li>• Traditional family practices are demonstrated in the multigenerational family, wherein both material support and respect for the elderly are the social norms.</li> <li>• Filial sacrifice is practiced at the risk of severe intergenerational conflicts, caregivers' dissatisfaction and isolation, and other types of family dysfunction in the absence of formal services</li> </ul>                                                                                                                                                                                                                                                                                                                 |
| R4   | Content analysis              | Thematic survey | husband 1, wife 7, daughter 2                                        | good | <ul style="list-style-type: none"> <li>• Understanding wandering behavior of the person with dementia</li> <li>• Increased burden due to being tied up with the responsibility of caring without fulfilling other roles</li> <li>• Increased threat to physical and mental health along with social isolation</li> </ul>                                                                                                                                                                                                                                                                                                                                                                                                                                                                                                |
| R5   | Inductive case study analysis | Thematic survey | daughter-in-law 5                                                    | high | <ul style="list-style-type: none"> <li>• Accepting the role of caring for parents-in-law as a responsibility with an attitude of self-sacrifice: daughter-in-law caregivers went through emotional changes over time (denial-submission-conflict-consciousness-growth)</li> <li>• Life disregarded by parents-in-law</li> <li>• The husband and in-laws' indifferent attitude towards caregiving and the person with dementia</li> <li>• Caring for an elderly with dementia at home leads to considerable pressure and increases juvenile problems, family crises, and various social problems</li> </ul>                                                                                                                                                                                                              |

|     |                   |                                 |                                                         |            |                                                                                                                                                                                                                                                                                                                                                                                                                                                                                                                                                                   |
|-----|-------------------|---------------------------------|---------------------------------------------------------|------------|-------------------------------------------------------------------------------------------------------------------------------------------------------------------------------------------------------------------------------------------------------------------------------------------------------------------------------------------------------------------------------------------------------------------------------------------------------------------------------------------------------------------------------------------------------------------|
| R6  | Phenomenology     | Conceptual/thematic description | husband 4, wife 1                                       | high       | <ul style="list-style-type: none"> <li>• Sudden diagnosis of dementia</li> <li>• Gradual hardships in caregiving decrease the quality of relationship with and form hatred toward the person with dementia</li> <li>• The burden of providing continuous care that their children do not willingly share with</li> <li>• The condition does not affect love</li> <li>-Feeling pity for the spouse with dementia</li> <li>-Being stressed for oneself</li> <li>-Usefulness of social services</li> <li>-Hoping for a cure, but regretting the lost time</li> </ul> |
| R7  | Narrative inquiry | Thematic survey                 | daughter 1, wife 1, son 1, daughter-in-law 1            | high       | <ul style="list-style-type: none"> <li>• The quality of the relationship between the person with dementia and family members prior to the diagnosis was likely to differentiate individual psychological responses toward the situation</li> <li>• Caring for a person with dementia requires the mother's involuntary sacrifice while spouse caregivers volunteered to take the brunt of caregiving</li> </ul>                                                                                                                                                   |
| R8  | Phenomenology     | Conceptual/thematic description | husband 4, wife 8                                       | high       | <ul style="list-style-type: none"> <li>• Jail without bars, no space for myself</li> <li>• An elderly couple in an empty nest</li> <li>• Natural companion as a soul mate: being grateful for the spouse's co-existence at the moment, compensating for the ill spouse's lifetime sacrifices and efforts</li> <li>• Incongruity in parents' duty: unable to fulfill the parenting role</li> <li>• Unmet expectations of children to share the responsibility of caring</li> </ul>                                                                                 |
| R9  | Phenomenology     | Conceptual/thematic description | wife 9                                                  | high       | <ul style="list-style-type: none"> <li>• Endless confrontation with the husband with dementia</li> <li>• Ambivalent feelings toward their children: gratitude vs. injured pride, feeling sad</li> <li>• Being isolated and tied down to the husband who is losing dignity</li> </ul>                                                                                                                                                                                                                                                                              |
| R10 | Narrative inquiry | Thematic survey                 | wife 1, son 2, daughter-in-law 1, daughter 1,           | acceptable | <ul style="list-style-type: none"> <li>• Experiencing family conflicts: feeling betrayed, losing trust, having issues with the spouse</li> <li>• Feeling distant from children; experiencing familial dissolution</li> <li>• Perceiving the caregiver role as spousal or filial duty</li> </ul>                                                                                                                                                                                                                                                                   |
| R11 | Content analysis  | Thematic survey                 | daughter-in-law 8, wife 5, daughter 3, sister/brother 1 | high       | <ul style="list-style-type: none"> <li>• Seeking help: sharing/distributing care responsibility was not an easy task for families with low solidarity</li> <li>• Venting emotions, improving mood by myself</li> <li>• Looking for help outside the family, relying on religion rather than turning to the family</li> </ul>                                                                                                                                                                                                                                      |
| R12 | Grounded theory   | Interpretive explanation        | daughter-in-law 8, wife 5, daughter 3, sister 1         | high       | <p>(Coping processes)</p> <ul style="list-style-type: none"> <li>• Problem recognition: recognizing the need for change in terms of family structure, exhaustion, and distress experienced by the primary caregiver</li> <li>• Burden mediation: re-distributing tasks and roles of household matters to decrease the burden on the primary caregiver</li> </ul>                                                                                                                                                                                                  |
| R13 | Content analysis  | Thematic survey                 | daughter-in-law 1, husband 1, daughter 4                | acceptable | <ul style="list-style-type: none"> <li>• Reluctance to accept the elderly with dementia</li> <li>• Experiencing frequent confrontation and disharmony among family members because of the person with dementia</li> <li>• Reorganizing family life in accordance with the daily life of the person with dementia</li> <li>• Role transition from care receiver to care provider for a parent with dementia is not easy to tolerate</li> <li>• Individualized ways to relieve distress from living with a person with dementia</li> </ul>                          |

|     |                             |                                 |                                                                   |            |                                                                                                                                                                                                                                                                                                                                                                                                                                                                               |
|-----|-----------------------------|---------------------------------|-------------------------------------------------------------------|------------|-------------------------------------------------------------------------------------------------------------------------------------------------------------------------------------------------------------------------------------------------------------------------------------------------------------------------------------------------------------------------------------------------------------------------------------------------------------------------------|
| R14 | Phenomenology               | Conceptual/thematic description | daughter 4, daughter-in-law 6                                     | good       | <ul style="list-style-type: none"> <li>• Caregivers being isolated from the rest of the family members who are reluctant to provide care assistance and address the caregiver's needs</li> <li>• Caregivers not wanting to pass their responsibility of caring for parents with dementia to their children.</li> </ul>                                                                                                                                                        |
| R15 | Thematic analysis,          | Thematic survey                 | daughter-in-law 10, daughter 2                                    | high       | <ul style="list-style-type: none"> <li>• Daughter-in-law caregivers perceive conflicts with the in-laws regarding dementia caregiving as the most stressful</li> <li>• The difference in the degree to which daughter-in-law caregivers and son caregivers accept the condition of dementia</li> <li>• Daughter caregivers experiencing marital conflicts when their husbands do not understand the hardships of providing care for their parents with dementia</li> </ul>    |
| R16 | Ethnography                 | Conceptual/thematic description | husband 3, wife 2, daughter 2, daughter-in-law 4, son-in-law 1    | acceptable | <ul style="list-style-type: none"> <li>• Lack of family members' understanding of the disease and caregiving circumstances fortified the primary caregiver's isolation</li> <li>• Psychological conflicts (feeling angry, being reproached, being driven to despair, blaming oneself, giving up lives)</li> <li>• Alienation of family extending to family discord and ideation of divorce</li> <li>• Gradual recognition of the family for the caregiver's effort</li> </ul> |
| R17 | Constant comparison methods | Thematic survey                 | daughter-in-law 11, daughter 2, wife 2, husband 1                 | acceptable | <ul style="list-style-type: none"> <li>• Behavioral coping strategies: direct behavior to deal with the environment and looking for information</li> <li>• Emotional coping strategies: effort to deal with denial and avoidance response to circumstances</li> <li>• Coping strategies for social support: religious support, seeking help from one's extended family</li> </ul>                                                                                             |
| R18 | Phenomenology               | Conceptual/thematic description | wife 4, husband 2                                                 | high       | <ul style="list-style-type: none"> <li>• Unstable life due to dementia</li> <li>• Caregiver's adaptation or coexistence with dementia</li> <li>• Overcoming the hardships that surround the life of the caregiver with filial support and assistance (managing behavioral problems, providing financial support, etc.)</li> </ul>                                                                                                                                             |
| R19 | Phenomenology               | Conceptual/thematic description | daughter-in-law 4, son 1, husband 1                               | good       | <ul style="list-style-type: none"> <li>• Resistance to accepting the caregiver role for parents-in-law with dementia could lead to a confrontation with the in-laws</li> <li>• Feeling hurt because of children who do not behave as the caregiver wants</li> </ul>                                                                                                                                                                                                           |
| R20 | Not mentioned               | Thematic survey                 | daughter 1, son 1, daughter-in-law 6                              | good       | <ul style="list-style-type: none"> <li>• Changes in relationships and ambivalent emotions about caregiving within the family</li> <li>• Suppressed anger and conflicts, guilt, and depression could lead to family dissolution</li> </ul>                                                                                                                                                                                                                                     |
| R21 | Phenomenology               | Conceptual/thematic description | husband 1, wife 3, daughter 2, daughter-in-law 3, granddaughter 1 | high       | <ul style="list-style-type: none"> <li>• Implement a team approach to take care of the person with dementia: taking turns to care for the person with dementia—the primary caregiver leading the team and the rest of the family assisting the caregiver</li> <li>• Questioning about the transgenerational continuity of filial piety</li> </ul>                                                                                                                             |

|     |                           |                                 |                                                             |            |                                                                                                                                                                                                                                                                                                                                                                                                                                                                                                                                                                                                                                                                                                                                        |
|-----|---------------------------|---------------------------------|-------------------------------------------------------------|------------|----------------------------------------------------------------------------------------------------------------------------------------------------------------------------------------------------------------------------------------------------------------------------------------------------------------------------------------------------------------------------------------------------------------------------------------------------------------------------------------------------------------------------------------------------------------------------------------------------------------------------------------------------------------------------------------------------------------------------------------|
| R22 | Phenomenology             | Conceptual/thematic description | husband 5                                                   | high       | <ul style="list-style-type: none"> <li>• Taking care of the person with dementia by oneself</li> <li>• Taking thorough care of her</li> <li>• Getting hurt by children and giving up on them</li> <li>• Voluntary dedication drawn from deep pity</li> <li>• Strong sense of responsibility from the feeling that there is no one else (to take care of her) but me</li> </ul>                                                                                                                                                                                                                                                                                                                                                         |
| R23 | Phenomenology             | Conceptual/thematic description | husband 6                                                   | high       | <ul style="list-style-type: none"> <li>• Taking the current life as caregiver based on the sense of fate</li> <li>• Experiencing genuine comfort through the self-help group that they have not felt anywhere else</li> </ul>                                                                                                                                                                                                                                                                                                                                                                                                                                                                                                          |
| R24 | Not mentioned             | Thematic survey                 | daughter-in-law 3, wife 3, daughter 4                       | high       | <ul style="list-style-type: none"> <li>• Spouse caregivers willingly undertook the care responsibility for their spouse with dementia in order not to pass any burden to their children.</li> <li>• In-laws did not appreciate the daughter-in-law's caregiving efforts at all; did not want to share the caregiving responsibility; became indifferent towards the person with dementia.</li> <li>• Self-help groups and day care centers were the major sources of support and information for dementia care rather than families</li> </ul>                                                                                                                                                                                         |
| R25 | Phenomenology             | Thematic survey                 | 20 family members with defecation care of dementia patients | good       | <ul style="list-style-type: none"> <li>• Frequent and unpredictable defecation problems tied the caregivers down to endless cleaning, which significantly hindered their daily lives</li> <li>• Caregivers' own life is very tough, and it worsens the relationship with her husband</li> </ul>                                                                                                                                                                                                                                                                                                                                                                                                                                        |
| R26 | Phenomenology             | Thematic survey                 | daughter-in-law 1, wife 1                                   | good       | <ul style="list-style-type: none"> <li>• Traditional filial piety accelerates guilt due to loss of dignity of the person with dementia and self-dissatisfaction with the quality of her care</li> <li>• Family members work together to meet increased care demands and provide comfort to each other</li> </ul>                                                                                                                                                                                                                                                                                                                                                                                                                       |
| R27 | Template analysis methods | Thematic survey                 | daughter-in-law 7, granddaughter 1, daughter 3, wife 1      | good       | <ul style="list-style-type: none"> <li>• Poor relationship with the parent-in-law with dementia decreased care quality: the caregiver was indifferent and uninterested about dementia, had an incorrect and subjective knowledge of dementia, and failed to recognize the symptoms in time.</li> <li>• Children cohabiting with the person with dementia lost respect for and courtesy toward the elderly with dementia</li> <li>• Distress from caring for a parent-in-law with dementia was projected over the caregiver's husband which resulted in marital conflicts</li> <li>• Difference in attitude towards dementia caregiving between daughter-in-law (feeling overwhelmed) and daughter caregivers (feeling pity)</li> </ul> |
| R28 | Phenomenology             | Thematic survey                 | granddaughter 1, daughter-in-law 1                          | acceptable | <ul style="list-style-type: none"> <li>• Although the caregiver(s) seemed to experience severe psychological distress, they expressed their filial duty of taking care of the person with dementia for as long as the person lived.</li> </ul>                                                                                                                                                                                                                                                                                                                                                                                                                                                                                         |
| R29 | Phenomenology             | Conceptual/thematic description | daughter-in-law 4                                           | high       | <ul style="list-style-type: none"> <li>• Beginning a life without me</li> <li>• Burden entrusted upon me: caregiving being taken for granted by considering it as a daughter-in-law's responsibility; feeling proud for fulfilling filial piety</li> <li>• Expecting reward from the husband</li> <li>• Adding more weight to the burden on the caregiver's back</li> <li>• Burden that I must carry all by myself (pain never appreciated, neglect of siblings)</li> </ul>                                                                                                                                                                                                                                                            |

|     |                             |                                 |                                                         |      |                                                                                                                                                                                                                                                                                                                                                                                                                                                                                                                                                                                                                                                                                                                                                                                  |
|-----|-----------------------------|---------------------------------|---------------------------------------------------------|------|----------------------------------------------------------------------------------------------------------------------------------------------------------------------------------------------------------------------------------------------------------------------------------------------------------------------------------------------------------------------------------------------------------------------------------------------------------------------------------------------------------------------------------------------------------------------------------------------------------------------------------------------------------------------------------------------------------------------------------------------------------------------------------|
| R30 | Grounded theory             | Conceptual/thematic description | husband 7                                               | high | <ul style="list-style-type: none"> <li>• Slowly accepting the wife's dementia</li> <li>• Striving (adjusting to reality, taking on her roles of mother and housewife, bearing the situation)</li> <li>• Acceptance (finding hope, finding the meaning of life in caregiving): the degree of attachment and affection between the couple affect the speed and degree of accepting the wife's non-natural disease</li> </ul>                                                                                                                                                                                                                                                                                                                                                       |
| R31 | Narrative inquiry           | Thematic survey                 | daughter-in-law 3                                       | high | <ul style="list-style-type: none"> <li>• Life without her own life</li> <li>• The desire to break away from her husband's family members: continuous confrontation with sister(s)-in-law who try to avoid the responsibility of care but supervise the caregiver's care practice from a superior standpoint</li> <li>• Unwillingly doing her duty: relationship with the parent-in-law with dementia prior to the diagnosis, individualistic thinking of not wasting their life at the expense of unwanted caregiving</li> <li>• Expecting some compensation from the husband</li> <li>• A sense of pride in doing her duties</li> </ul>                                                                                                                                         |
| R32 | Categorical aggregation     | Thematic survey                 | wife 5, son 1, daughter-in-law 1, granddaughter 1       | high | <ul style="list-style-type: none"> <li>• Increased violence from the person with dementia often exceeds individual care capacity</li> <li>• Family as the primary source of support that determine the degree of negative experience of caregiving</li> <li>• Unsatisfactory assistance by cohabiting family members lead to family conflicts</li> <li>• The taken-for-granted responsibility of caring for the spouse with dementia</li> <li>• Non-cohabiting but supportive adult children</li> </ul>                                                                                                                                                                                                                                                                          |
| R33 | Content analysis            | Thematic survey                 | daughter-in-law 2, wife 3, sister 1, daughter 2         | good | <ul style="list-style-type: none"> <li>• Maintaining a relationship with the person with dementia: seeking psychological comfort by empathizing with others, comfort based on trust, resting together with the person with dementia</li> <li>• Perceiving the responsibility of caring for the elderly with dementia as part of fate</li> </ul>                                                                                                                                                                                                                                                                                                                                                                                                                                  |
| R34 | Content analysis            | Conceptual/thematic description | daughter 13, wife 9, daughter-in-law 7, son 1, sister 1 | high | <ul style="list-style-type: none"> <li>• The confronting stage: severe negative feelings and exhaustion following the person's diagnosis of dementia.</li> <li>• Major driving forces in taking good care of the person with dementia: having positive memories of the person with dementia, family and social support</li> <li>• Obtaining comfort through interacting with caregiver groups at the community center</li> </ul>                                                                                                                                                                                                                                                                                                                                                 |
| R35 | Constant comparison methods | Thematic survey                 | 9(husband, wife, daughter, daughter-in-law, son)        | good | <ul style="list-style-type: none"> <li>• The caregiver's relationship with the person with dementia prior to diagnosis affects the quality of the current relationship and the patient's abnormal behavior.</li> <li>• Nature of the relationship between the primary and secondary caregivers is conflictive</li> <li>• The degree of perceived responsibility varies depending on who the caregiver is. Spouses tend to assume full responsibility, while children tend to expect the entire family to participate in caretaking.</li> <li>• Child caregivers expect other family members' participation in caregiving but do not allow them to take control over caregiving</li> <li>• Family conflicts lead to negative social support for the primary caregiver.</li> </ul> |
| R36 | Phenomenology               | Thematic survey                 | wife 2                                                  | good | <ul style="list-style-type: none"> <li>• Heavy role</li> <li>• Limitations in social activities</li> <li>• Efforts to adapt including participating in activities to maintain the caregiver's own quality of life</li> </ul>                                                                                                                                                                                                                                                                                                                                                                                                                                                                                                                                                     |

|     |                           |                 |                                            |      |                                                                                                                                                                                                                                                                                                                                                                                                                                                                                                                                                                                                                                             |
|-----|---------------------------|-----------------|--------------------------------------------|------|---------------------------------------------------------------------------------------------------------------------------------------------------------------------------------------------------------------------------------------------------------------------------------------------------------------------------------------------------------------------------------------------------------------------------------------------------------------------------------------------------------------------------------------------------------------------------------------------------------------------------------------------|
| R37 | Thematic content analysis | Thematic survey | daughter-in-law 7, wife 2, granddaughter 1 | high | <ul style="list-style-type: none"> <li>• Androcentric view of family caregiving: women as the agent of performing care activities vs. men as the breadwinner and supervisor of the care practice</li> <li>• Family members undervaluing family caregiving: associated with lack of communication among family members and the caregiver's somatization of distress</li> <li>• Self-rationalization in the context of family caregiving: fulfilling the filial duty</li> <li>• Inter-familial relationships among women: designated female caregiver and other women within a family are likely to have conflictive relationships</li> </ul> |
|-----|---------------------------|-----------------|--------------------------------------------|------|---------------------------------------------------------------------------------------------------------------------------------------------------------------------------------------------------------------------------------------------------------------------------------------------------------------------------------------------------------------------------------------------------------------------------------------------------------------------------------------------------------------------------------------------------------------------------------------------------------------------------------------------|

\* This number corresponds to the number of 'Reference List 2'
